# Supplementary material for: Microbial Community Structure and Ecological Networks during Simulation of Diatom Sinking
Source: MDPI journal article supplement (doi:10.3390/microorganisms10030639), 2022-03-17
Supplement: s1 [file s1]

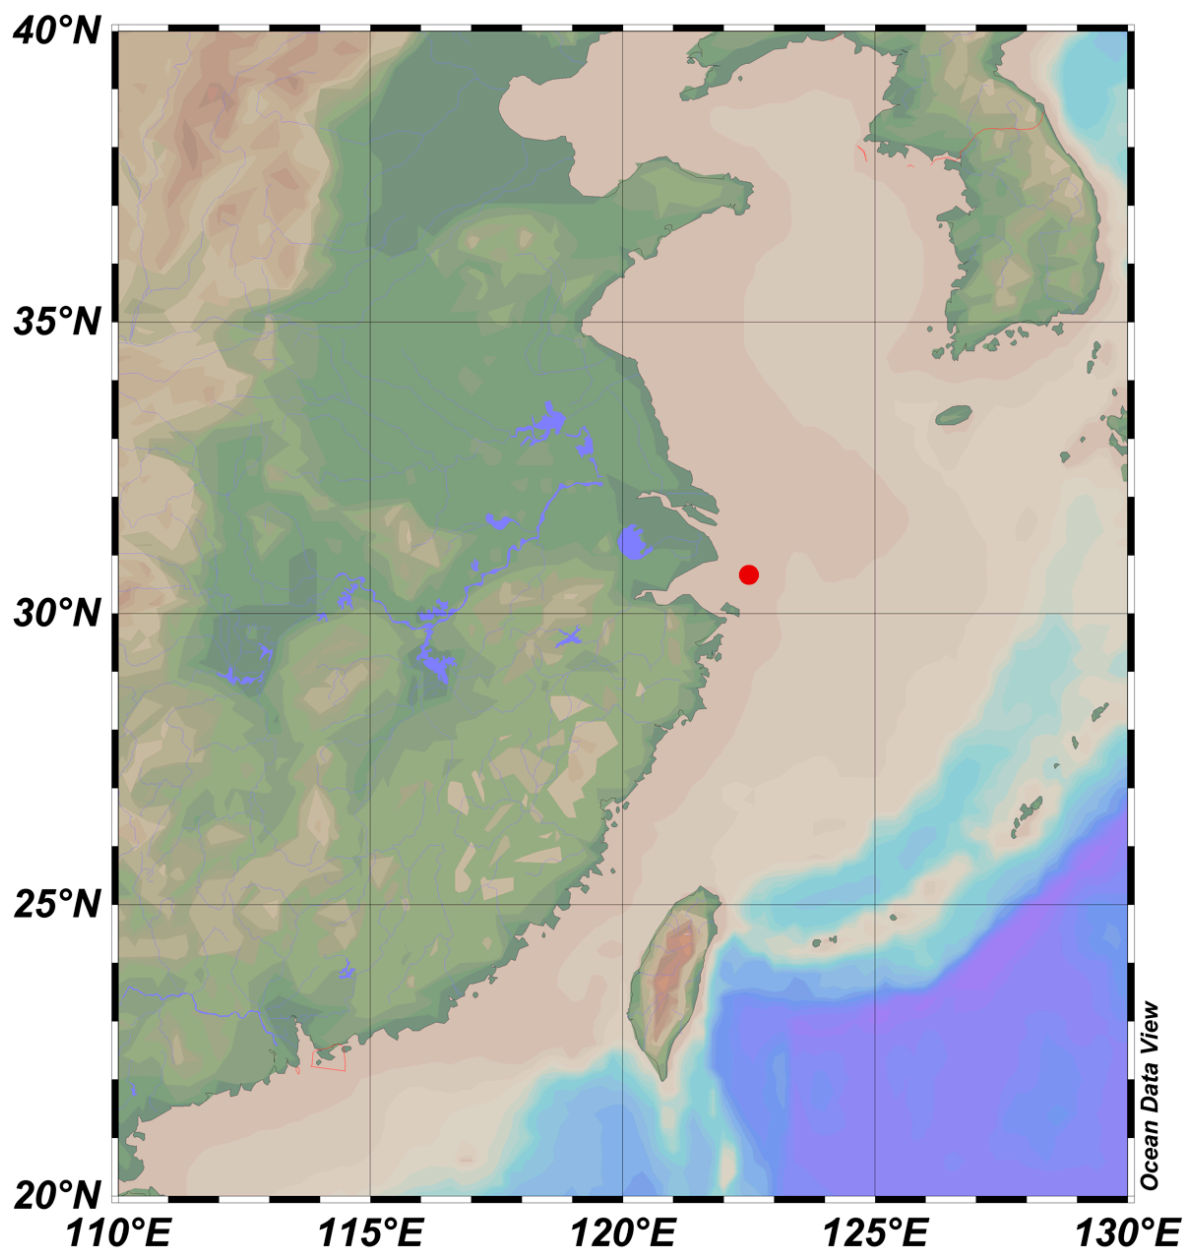

**Figure S1.** Location of the seawater sampling site in the East China Sea (the red dot).

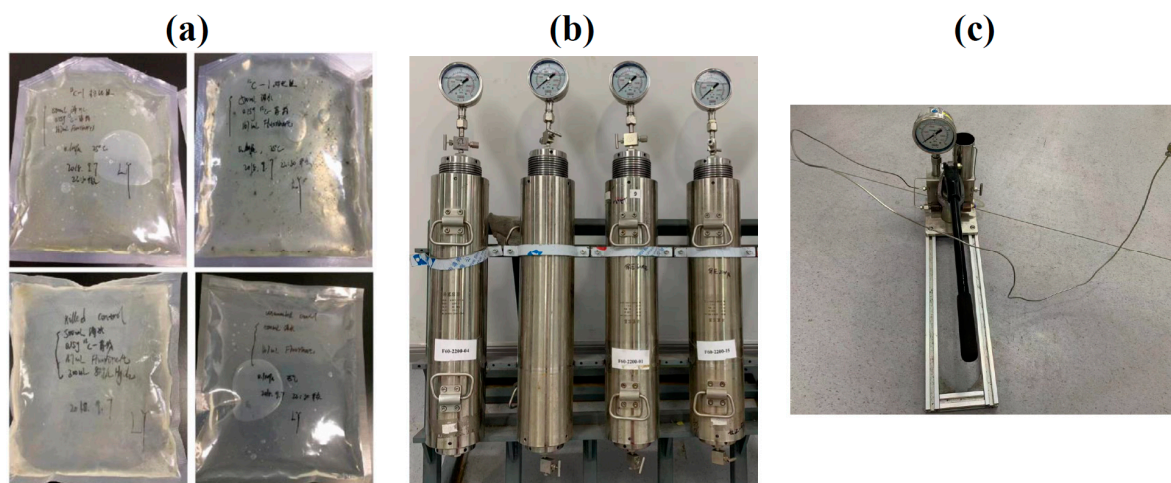

**Figure S2.** High-pressure incubation equipments. (a) Schematic of four 710-mL incubation pouches; (b) schematic of the pressure vessels; (c) schematic of a hand-operated pump.

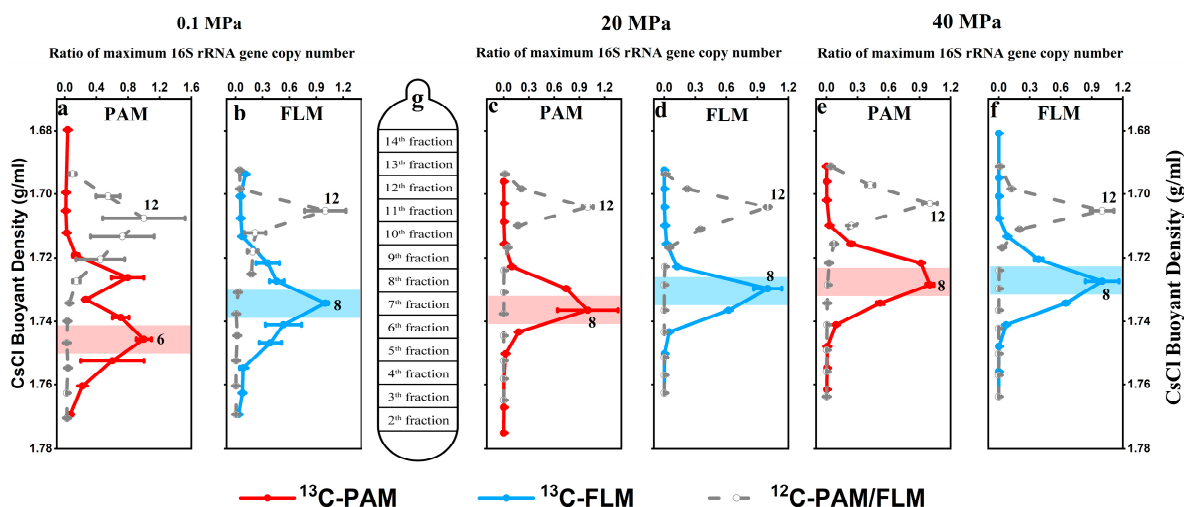

**Figure S3.** The quantitative distribution of the 16S rRNA gene in the 3<sup>th</sup>-14<sup>th</sup> DNA fractions across different buoyant density gradients of the PAM and FLM assemblages incubated with <sup>13</sup>C- or <sup>12</sup>C-POC at 0.1, 20 and 40 MPa. (a) 0.1 MPa-PAM; (b) 0.1 MPa-FLM; (c) 20 MPa-PAM; (d) 20 MPa-FLM; (e) 40 MPa-PAM; (f) 40 MPa-FLM.

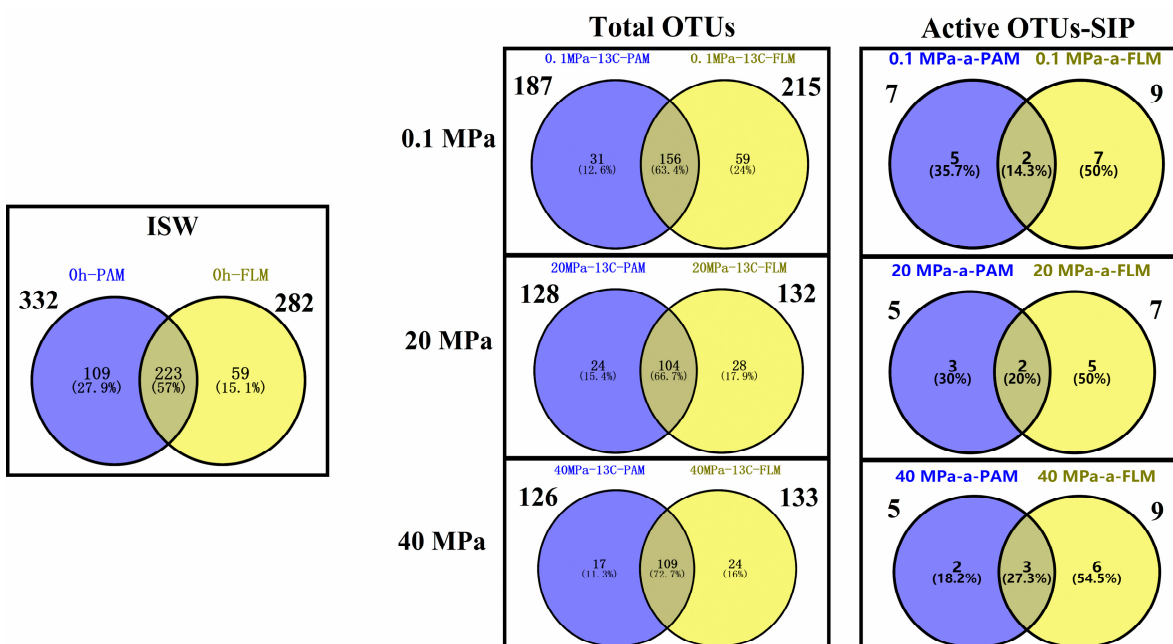

**Figure S4.** Venn diagrams showing the number and percentage of shared and unique OTUs in the ISW, total, and active PAM and FLM assemblages incubated at 0.1, 20, and 40 MPa. ISW represents the East China Sea in-situ surface water.

**Table S1.** The physical and chemical parameters of the surface water collected from the East China Sea.

| Depth (m) | Temperature (°C) | Salinity (‰) | Dissolved oxygen (ml L <sup>-1</sup> ) | POC concentration(mg L <sup>-1</sup> ) | DOC concentration(mg L <sup>-1</sup> ) |
|-----------|------------------|--------------|----------------------------------------|----------------------------------------|----------------------------------------|
| 15        | 25               | 33           | 0.08                                   | 0.14                                   | 1.02                                   |

**Table S2.** The 16S rRNA gene sequencing data of PAM and FLM at 0.1, 20, and 40 MPa, respectively.

| Sample number | Sequence number | Total OTUs | OTUs of PAM | OTUs of FLM | Shared OTUs between PAM and FLM |
|---------------|-----------------|------------|-------------|-------------|---------------------------------|
| 78            | 3,615,779       | 1033       | 929         | 835         | 731                             |

**Table S3.** Diversity indices of the total and active PA and FL microbial 16S rRNA gene at 0.1, 20, and 40 MPa, respectively.

| Sample Name       |                         | Sequences | OTUs  | Shannon | Chao   | Coverage (%) |
|-------------------|-------------------------|-----------|-------|---------|--------|--------------|
| ISW               | PAM                     | 39026     | 396   | 2.71    | 403.75 | 99.8         |
|                   | FLM                     | 69244     | 393   | 3.81    | 453.63 | 99.9         |
| 0.1MPa-total      | <sup>13</sup> C-labeled | PAM       | 66093 | 259     | 3.19   | 99.9         |
|                   |                         | FLM       | 40076 | 267     | 3.57   | 99.9         |
|                   | <sup>12</sup> C-control | PAM       | 50429 | 265     | 3.34   | 99.9         |
|                   |                         | FLM       | 70471 | 294     | 3.64   | 99.9         |
| 20MPa-total       | <sup>13</sup> C-labeled | PAM       | 59114 | 175     | 2.69   | 99.9         |
|                   |                         | FLM       | 30024 | 160     | 2.67   | 99.9         |
|                   | <sup>12</sup> C-control | PAM       | 41372 | 145     | 2.10   | 99.9         |
|                   |                         | FLM       | 69275 | 190     | 2.75   | 99.9         |
| 40MPa-total       | <sup>13</sup> C-labeled | PAM       | 59342 | 167     | 2.89   | 99.9         |
|                   |                         | FLM       | 44942 | 162     | 2.94   | 99.9         |
|                   | <sup>12</sup> C-control | PAM       | 29546 | 112     | 2.34   | 99.9         |
|                   |                         | FLM       | 36351 | 132     | 2.42   | 99.9         |
| 0.1MPa-SIP-active | <sup>13</sup> C-labeled | PAM       | 35756 | 202     | 3.13   | 99.9         |
|                   |                         | FLM       | 22218 | 253     | 3.36   | 99.9         |
|                   | <sup>12</sup> C-control | PAM       | 41744 | 163     | 3.29   | 99.9         |
|                   |                         | FLM       | 26979 | 225     | 3.61   | 99.9         |
| 20MPa-SIP-active  | <sup>13</sup> C-labeled | PAM       | 34219 | 136     | 1.91   | 99.9         |
|                   |                         | FLM       | 38777 | 146     | 3.25   | 100          |
|                   | <sup>12</sup> C-control | PAM       | 69650 | 365     | 2.29   | 99.9         |
|                   |                         | FLM       | 49472 | 438     | 3.24   | 99.9         |
| 40MPa-fraction    | <sup>13</sup> C-labeled | PAM       | 42374 | 133     | 2.24   | 99.9         |
|                   |                         | FLM       | 59711 | 144     | 2.75   | 99.9         |
|                   | <sup>12</sup> C-control | PAM       | 50597 | 171     | 2.55   | 99.9         |
|                   |                         | FLM       | 28458 | 144     | 2.41   | 99.9         |

**Table S4.** The P values and significance of alpha diversity indices and OTUs number between different comparisons in the total and active microbial communities.

| Comparisons |                | Shannon index |              | Simpson even index |              | Chao1 index |              | OTUs number |              |
|-------------|----------------|---------------|--------------|--------------------|--------------|-------------|--------------|-------------|--------------|
|             |                | P value       | Significance | P value            | Significance | P value     | Significance | P value     | Significance |
| Total-PA    | 0.1 vs. 20 MPa | 0.0001        | ***          | 0.00004            | ***          | 0.0000003   | ***          | #####<br>## | ***          |
|             | 0.1 vs. 40 MPa | 0.0007        | ***          | 0.24278            | NS           | 0.0000319   | ***          | #####<br>## | ***          |

|                         |                |         |     |         |     |               |     |                 |     |
|-------------------------|----------------|---------|-----|---------|-----|---------------|-----|-----------------|-----|
|                         | 20 vs. 40 MPa  | 0.2628  | NS  | 0.00024 | *** | 0.374609<br>9 | NS  | #####<br>##     | NS  |
| <b>Total-FL</b>         | 0.1 vs. 20 MPa | 0.0000  | *** | 0.00013 | *** | 0.000187<br>5 | *** | #####<br>##     | *** |
|                         | 0.1 vs. 40 MPa | 0.0001  | *** | 0.62306 | NS  | 0.000059<br>0 | *** | #####<br>##     | *** |
|                         | 20 vs. 40 MPa  | 0.8378  | NS  | 0.13404 | NS  | 0.142995<br>6 | NS  | #####<br>##     | *   |
|                         | ISW            | 0.33185 | NS  | 0.50877 | NS  | 0.423         | NS  | 0.7059589<br>01 | NS  |
| <b>Total-PA vs. FL</b>  | 0.1 MPa        | 0.00007 | *** | 0.00041 | *** | 0.268         | NS  | 0.0037015<br>12 | **  |
|                         | 20 MPa         | 0.04651 | *   | 0.00003 | *** | 0.135         | NS  | 0.0042608<br>44 | **  |
|                         | 40 MPa         | 0.75391 | NS  | 0.46776 | NS  | 0.788         | NS  | 0.3245650<br>78 | NS  |
| <b>Active-PA</b>        | 0.1 vs. 20 MPa | 0.0009  | *** | 0.01104 | *   | 0.197304<br>4 | NS  | #####<br>##     | *** |
|                         | 0.1 vs. 40 MPa | 0.0032  | **  | 0.12632 | NS  | 0.051197<br>0 | NS  | #####<br>##     | **  |
|                         | 20 vs. 40 MPa  | 0.1322  | NS  | 0.08799 | NS  | 0.841116<br>8 | NS  | #####<br>##     | NS  |
| <b>Active-FL</b>        | 0.1 vs. 20 MPa | 0.0001  | *** | 0.54958 | NS  | 0.004935<br>5 | **  | #####<br>##     | *** |
|                         | 0.1 vs. 40 MPa | 0.0010  | **  | 0.97744 | NS  | 0.013833<br>6 | *   | #####<br>##     | **  |
|                         | 20 vs. 40 MPa  | 0.0187  | *   | 0.51330 | NS  | 0.143424<br>1 | NS  | #####<br>##     | NS  |
| <b>Active-PA vs. FL</b> | 0.1 MPa        | 0.14195 | NS  | 0.56260 | NS  | 0.048         | *   | 0.0131068<br>54 | *   |
|                         | 20 MPa         | 0.04016 | *   | 0.07210 | NS  | 0.734         | NS  | 0.3294603<br>31 | NS  |
|                         | 40 MPa         | 0.09487 | NS  | 0.44516 | NS  | 0.316         | NS  | 0.3020231<br>96 | NS  |

**Table S5.** Analysis of similarity (ANOSIM) between the PAM and FLM assemblages before and after incubation at 0.1, 20, and 40 MPa, respectively.

|               | ANOSIM                         | R value            | P value |
|---------------|--------------------------------|--------------------|---------|
| Comparison 1  | <b>Total-PA vs. total-FL</b>   | ISW                | 0.667   |
| Comparison 2  |                                | 0.1 MPa            | 1.000   |
| Comparison 3  |                                | 20 MPa             | 1.000   |
| Comparison 4  |                                | 40 MPa             | 0.482   |
| Comparison 5  | <b>Active PA vs. active-FL</b> | 0.1 MPa            | 0.333   |
| Comparison 6  |                                | 20 MPa             | 0.630   |
| Comparison 7  |                                | 40 MPa             | 0.519   |
| Comparison 8  | <b>Total</b>                   | ISW vs. 0.1 MPa    | 0.865   |
| Comparison 9  |                                | ISW vs. 20 MPa     | 0.848   |
| Comparison 10 |                                | ISW vs. 40 MPa     | 0.878   |
| Comparison 11 |                                | 0.1 MPa vs. 20 MPa | 1.000   |
| Comparison 12 |                                | 0.1 MPa vs. 40 MPa | 0.948   |
| Comparison 13 |                                | 20 MPa vs. 40 MPa  | 0.678   |
| Comparison 14 | <b>Active</b>                  | ISW vs. 0.1 MPa    | 0.759   |

|               |                    |       |          |
|---------------|--------------------|-------|----------|
| Comparison 15 | ISW vs. 20 MPa     | 0.767 | 0.001*** |
| Comparison 16 | ISW vs. 40 MPa     | 0.763 | 0.002**  |
| Comparison 17 | 0.1 MPa vs. 20 MPa | 1.000 | 0.001*** |
| Comparison 18 | 0.1 MPa vs. 40 MPa | 0.898 | 0.003**  |
| Comparison 19 | 20 MPa vs. 40 MPa  | 0.741 | 0.003**  |

**Table S6.** phylogenetic classification and average relative abundance of module hubs and connectors for the PAM and FLM communities at 0.1, 20, and 40 MPa.

| Classification of nodesB3:158    | Groups     | OTU ID  | Zi    | Pi   | Phylum/Class        | Genus                                           | Ave. Rela.Abun. (%) |
|----------------------------------|------------|---------|-------|------|---------------------|-------------------------------------------------|---------------------|
| Module hubs (Zi≥2.5; Pi < 0.62)  | 0.1MPa-PAM | OTU118  | 3.31  | 0.00 | Gammaproteobacteria | <i>Alteromonas</i>                              | 0.018               |
|                                  |            | OTU988  | 2.90  | 0.00 | Gammaproteobacteria | <i>Marinomonas</i>                              | 2.158               |
|                                  |            | OTU862  | 2.71  | 0.38 | Betaproteobacteria  | <i>Pseudogulbenkiania</i>                       | 0.014               |
|                                  |            | OTU492  | 2.71  | 0.10 | Chlamydiae          | unclassified Parachlamydiaceae                  | 0.014               |
|                                  | 20MPa-PAM  | OTU590  | 2.86  | 0.00 | Cyanobacteria       | norank Cyanobacteria                            | 0.011               |
|                                  | 40MPa-PAM  | OTU578  | 2.52  | 0.42 | Alphaproteobacteria | <i>Tropicimonas</i>                             | 0.006               |
|                                  |            | OTU864  | 2.52  | 0.42 | Parcubacteria       | unclassified Parcubacteria                      | 0.011               |
|                                  |            | OTU979  | 2.52  | 0.42 | Alphaproteobacteria | unclassified Alphaproteobacteria Incertae Sedis | 0.013               |
|                                  |            | OTU930  | 2.51  | 0.57 | Acidobacteria       | <i>Candidatus Solibacter</i>                    | 0.010               |
|                                  | 0.1MPa-PAM | OTU882  | -0.94 | 0.63 | Alphaproteobacteria | norank Mitochondria                             | 0.013               |
|                                  | 20MPa-PAM  | OTU893  | 0.71  | 0.67 | Deltaproteobacteria | unclassified Deltaproteobacteria                | 0.084               |
|                                  |            | OTU972  | 0.71  | 0.67 | Actinobacteria      | unclassified Microbacteriaceae                  | 0.022               |
|                                  |            | OTU1034 | -0.01 | 0.63 | Gracilibacteria     | norank Gracilibacteria                          | 0.033               |
| Connectors (Zi < 2.5; Pi ≥ 0.62) | 40MPa-PAM  | OTU993  | -1.67 | 0.67 | Alphaproteobacteria | <i>Woodsholea</i>                               | 3.103               |
|                                  |            | OTU977  | -0.27 | 0.66 | Alphaproteobacteria | <i>Roseomonas</i>                               | 0.390               |
|                                  |            | OTU945  | -0.03 | 0.66 | Deltaproteobacteria | unclassified Deltaproteobacteria                | 0.019               |
|                                  |            | OTU516  | 1.33  | 0.64 | Actinobacteria      | <i>Rhodococcus</i>                              | 0.008               |
|                                  | 0.1MPa-FLM | OTU98   | 0.23  | 0.64 | Bacteroidetes       | unclassified Flavobacteriaceae                  | 0.029               |
|                                  |            | OTU897  | -0.27 | 0.63 | Alphaproteobacteria | unclassified Rhodospirillaceae                  | 0.010               |
|                                  |            | OTU942  | -0.54 | 0.63 | Deltaproteobacteria | <i>Bdellovibrio</i>                             | 0.014               |
|                                  |            | OTU534  | 0.09  | 0.70 | Planctomycetes      | norank S-70                                     | 0.008               |
|                                  | 0.1MPa-FLM | OTU850  | 0.09  | 0.70 | Chlamydiae          | unclassified Parachlamydiaceae                  | 0.006               |
|                                  |            | OTU852  | 0.09  | 0.70 | Deinococcus-Thermus | <i>Deinococcus</i>                              | 0.008               |

|               |             |       |      |                     |                                      |       |
|---------------|-------------|-------|------|---------------------|--------------------------------------|-------|
| 20MPa-<br>FLM | OTU925      | 0.09  | 0.70 | Alphaproteobacteria | <i>Sphingomonas</i>                  | 0.006 |
|               | OTU927      | 0.09  | 0.70 | Planctomycetes      | norank S-70                          | 0.008 |
|               | OTU928      | 0.74  | 0.70 | Chlamydiae          | norank Chlamydiaceae                 | 0.006 |
|               | OTU493      | -0.56 | 0.69 | Actinobacteria      | <i>Nocardia</i>                      | 0.014 |
|               | OTU103<br>0 | -0.03 | 0.69 | Gammaproteobacteria | unclassified Alteromonadales         | 0.011 |
|               | OTU103<br>1 | 1.17  | 0.68 | Gammaproteobacteria | unclassified Oceanospirillaceae      | 0.032 |
|               | OTU200      | -0.05 | 0.68 | Verrucomicrobia     | norank OPB35 soil group              | 0.022 |
|               | OTU186      | 1.17  | 0.68 | Bacteroidetes       | <i>Aureispira</i>                    | 0.008 |
|               | OTU89       | 1.17  | 0.68 | Alphaproteobacteria | unclassified Rhodobacteraceae        | 0.006 |
|               | OTU952      | 1.17  | 0.68 | Gammaproteobacteria | <i>Aquicella</i>                     | 0.006 |
|               | OTU18       | 1.78  | 0.64 | Bacteroidetes       | <i>Pseudofulvibacter</i>             | 0.008 |
|               | OTU222      | -0.54 | 0.63 | Betaproteobacteria  | OM43 clade                           | 0.013 |
|               | OTU793      | 1.70  | 0.62 | Parcubacteria       | norank Candidatus Giovannonibacteria | 0.016 |
|               | OTU835      | 0.98  | 0.78 | Gammaproteobacteria | SAR92 clade                          | 0.008 |
|               | OTU995      | 0.98  | 0.78 | Alphaproteobacteria | norank SM2D12                        | 0.010 |
|               | OTU109      | 0.00  | 0.76 | Bacteroidetes       | norank NS11-12 marine group          | 0.013 |
|               | OTU100<br>1 | 0.19  | 0.76 | Deltaproteobacteria | norank mle1-27                       | 0.008 |
|               | OTU102<br>6 | 1.36  | 0.71 | Firmicutes          | <i>Atopostipes</i>                   | 0.006 |
|               | OTU497      | 1.36  | 0.71 | Actinobacteria      | <i>Gaiella</i>                       | 0.008 |
|               | OTU277      | 0.96  | 0.71 | Gammaproteobacteria | unclassified Gammaproteobacteria     | 0.014 |
|               | OTU302      | 1.73  | 0.70 | Planctomycetes      | <i>Planctomyces</i>                  | 0.013 |
|               | OTU944      | 1.76  | 0.70 | Alphaproteobacteria | <i>Methylobacterium</i>              | 0.010 |
|               | OTU93       | 0.37  | 0.69 | Alphaproteobacteria | <i>Labrenzia</i>                     | 0.010 |
|               | OTU104      | 0.00  | 0.64 | Gracilibacteria     | norank Gracilibacteria               | 0.025 |
|               | OTU501      | -0.66 | 0.64 | Gammaproteobacteria | <i>Stenotrophomonas</i>              | 0.014 |
|               | OTU174      | 0.95  | 0.63 | Alphaproteobacteria | unclassified Holosporaceae           | 0.053 |
|               | OTU500      | 0.85  | 0.63 | Planctomycetes      | <i>Pirellula</i>                     | 0.008 |
|               | OTU833      | 0.85  | 0.63 | Alphaproteobacteria | <i>Pseudophaeobacter</i>             | 0.010 |
|               | OTU943      | 0.85  | 0.63 | Actinobacteria      | <i>Candidatus Aquiluna</i>           | 0.010 |
|               | OTU116      | 0.85  | 0.63 | Alphaproteobacteria | unclassified Rhodobacteraceae        | 0.014 |
| 40MPa-<br>FLM | OTU592      | 0.26  | 0.74 | Actinobacteria      | <i>Iamia</i>                         | 0.011 |
|               | OTU562      | -0.58 | 0.63 | Actinobacteria      | <i>Nocardioides</i>                  | 0.010 |
